# Supplementary material for: Impact of the lanthanide contraction on the activity of a lanthanide-dependent methanol dehydrogenase – a kinetic and DFT study
Source: PubMed Central journal article supplement — Dalton Trans. 2018 Jul 18;47(31):10463–72. doi: 10.1039/c8dt01238e (PMC6085770; doi:10.1039/c8dt01238e), 2018-07-18
Supplement: DT-047-C8DT01238E-s002.pdf [file DT-047-C8DT01238E-s002.pdf]

Supporting Information for

**Impact of the Lanthanide Contraction on the Activity of a Lanthanide-dependent  
Methanol Dehydrogenase – A Kinetic and DFT Study**

Henning Lumpe, Arjan Pol, Huub J.M. Op den Camp and Lena J. Daumann

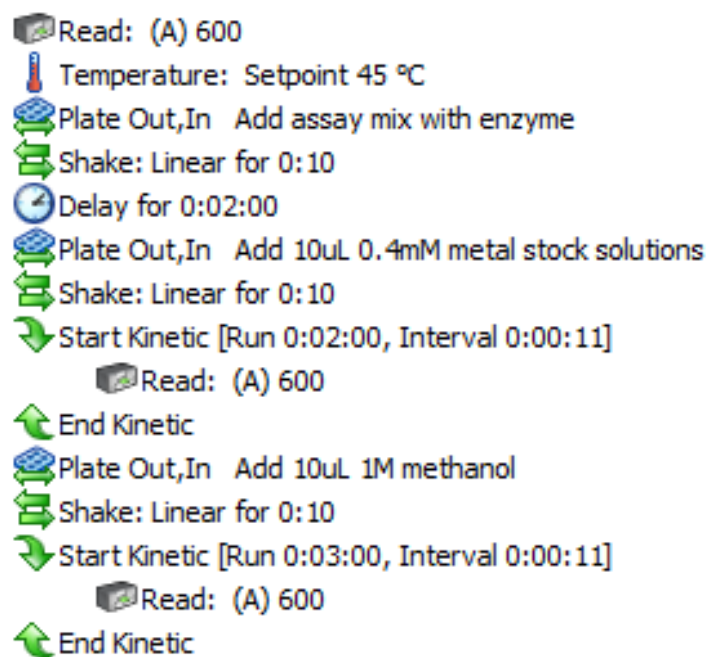

**Figure S1** Typical procedure for the Epoch 2 plate-reader assay with Eu-MDH and different lanthanide ions. The plate type used was a 96 well plate. A path length correction was applied (Path length Correction: 977 / 900, Absorbance at 1 cm: 0.18)

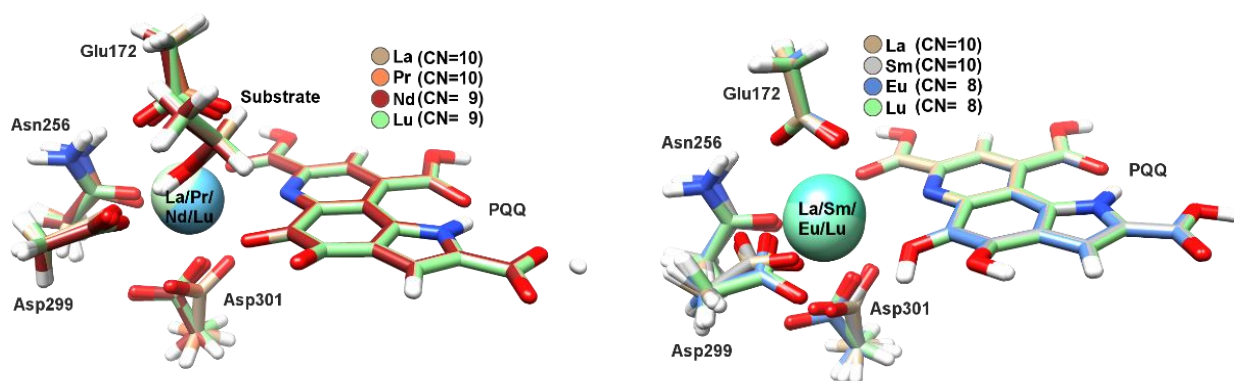

**Figure S2 Left:** Optimized Structures for the active center with PQQ<sup>0</sup>, substrate and La (tan), Pr (light brown), Nd (brown) and Lu (green). **Right:** Optimized Structures for the active center with PQQH<sub>2</sub> and La (tan), Sm (grey), Eu (blue) and Lu (green) - Images generated with the UCSF Chimera package.<sup>[1]</sup> Structure optimizations were similar to a procedure described by Schelter *et al.*<sup>[2]</sup> and performed using Gaussian 09<sup>[3]</sup> and the B3LYP functional with the 6-31G(d) basis set for C, H, N, O.<sup>[4-9]</sup> Starting point was the crystal structure of the known Ce-MDH (PDB 4MAE).<sup>[10]</sup> The present amino acids in the active site were truncated and the terminal carbon atoms, as well as all of the PQQ-atoms were frozen, to mimic the sterics imposed by the protein. The present polyethyleneglycol was truncated as well and used as a substrate-model. The cerium atom was then exchanged with every Ln in the series. Quasi relativistic effective core potentials (ECP) and segmented basis sets were used for the central metal: ECP-MWB46+4f<sup>n</sup>.<sup>[11-13]</sup> Calculations were performed with 11 outer sphere electrons, as pseudo-singlets (f-electrons included in ECP) and restricted closed-shell calculations.<sup>14</sup> Calculations were conducted in the gas phase. For additional active site calculations, the truncated polyethylene glycol residue was manually removed, and/or the PQQ-quinone part was manually converted to the quinol. For simplification, the added quinol protons were frozen as well in their position. In case of Gd, the Harris functional was not able to form the initial guess, therefore the core Hamiltonian was used instead, using “guess=(core,always)”. None of the calculations showed negative frequencies.

**Figure S3** Example input for Gaussian optimizations (in this case La<sup>3+</sup> PQQ with substrate). -1 denotes a frozen carbon atom.

```
%chk=57-LaIII-PQQ-with-Substrate.chk
%mem=64GB
%nprocshared=4
#p opt freq rb3lyp/gen geom=connectivity 5d 7f
pseudo=read

La(III) - PQQ – with substrate

0 1
C -1 -4.90400000 3.34400000 3.52500000
C 0 -4.43100000 2.75000000 2.21200000
O 0 -5.31600000 2.48300000 1.32700000
O 0 -3.21300000 2.47700000 2.02300000
C -1 -7.59200000 1.55900000 -2.75400000
C 0 -6.78400000 1.98800000 -1.55100000
O 0 -5.53400000 1.90100000 -1.57100000
N 0 -7.44100000 2.47100000 -0.49176943
C -1 -7.57000000 -2.04200000 0.45144469
C 0 -6.14900000 -1.61500000 0.75161945
O 0 -5.81500000 -0.46701986 0.29292243
O 0 -5.39000000 -2.35900000 1.42100000
C -1 -3.16200000 -0.96440872 -4.27600000
C 0 -3.96500000 -0.84870079 -2.97500000
O 0 -5.10800000 -1.31100000 -2.91900000
O 0 -3.34000000 -0.27056742 -1.98200000
N -1 3.33000000 -0.81662988 1.47900000
C -1 3.61300000 -2.05900000 1.97300000
C -1 5.01500000 -2.49400000 2.20800000
O -1 5.88200000 -1.54200000 1.91200000
O -1 5.26800000 -3.61500000 2.62500000
C -1 2.41800000 -2.74800000 2.13600000
C -1 1.39400000 -1.87800000 1.71500000
C -1 1.99200000 -0.65850047 1.29400000
C -1 -0.03196565 -2.09600000 1.68300000
O -1 -0.65585683 -3.02200000 2.17600000
C -1 -0.80639866 -0.98447544 0.95671480
O -1 -1.97200000 -1.16300000 0.63270177
C -1 -0.13660882 0.31747211 0.63836618
N -1 -0.97622754 1.23100000 0.17358237
C -1 -0.50347008 2.43600000 -0.15877326
C -1 -1.51600000 3.38500000 -0.69429278
O -1 -2.68200000 3.07700000 -0.90161786
O -1 -1.02900000 4.60100000 -0.94685640
C -1 0.84871874 2.74100000 -0.04652754
C -1 1.77100000 1.78600000 0.39850560
C -1 3.21000000 2.20900000 0.35976671
O -1 3.37200000 3.51000000 0.13590368
O -1 4.17700000 1.46400000 0.47970217
```

|       |                          |             |             |             |                         |
|-------|--------------------------|-------------|-------------|-------------|-------------------------|
| C     | -1                       | 1.28200000  | 0.49657896  | 0.78449450  | 26                      |
| O     | 0                        | -3.93300000 | -0.32848794 | 2.35300000  | 27 28 2.0 29 1.0        |
| C     | 0                        | -3.16200000 | -0.45069210 | 3.55200000  | 28 70 1.0               |
| C     | -1                       | -4.04600000 | -0.73580415 | 4.76200000  | 29 30 1.5 40 1.5        |
| H     | 0                        | -7.34200000 | 2.20600000  | -3.60200000 | 30 31 1.5 70 1.0        |
| H     | 0                        | -7.28400000 | 0.54246200  | -3.01600000 | 31 32 1.0 35 1.5        |
| H     | 0                        | -8.67000000 | 1.59400000  | -2.58300000 | 32 33 2.0 34 1.5        |
| H     | 0                        | -7.70800000 | -2.10900000 | -0.63361256 | 33 70 1.0               |
| H     | 0                        | -7.80300000 | -3.00600000 | 0.90925659  | 34 64 1.0               |
| H     | 0                        | -8.26700000 | -1.28200000 | 0.82000108  | 35 36 1.5 62 1.0        |
| H     | 0                        | -5.67800000 | 4.09600000  | 3.34900000  | 36 37 1.0 40 1.5        |
| H     | 0                        | -5.35100000 | 2.54500000  | 4.12900000  | 37 38 1.5 39 2.0        |
| H     | 0                        | -4.07300000 | 3.78100000  | 4.08500000  | 38 61 1.0               |
| H     | 0                        | -4.78000000 | 0.06458975  | 4.90600000  | 39                      |
| H     | 0                        | -4.58800000 | -1.67900000 | 4.63500000  | 40                      |
| H     | 0                        | -3.43600000 | -0.81454479 | 5.67000000  | 41 42 1.0 69 1.0 70 1.0 |
| H     | 0                        | -2.63900000 | 0.50250317  | 3.66600000  | 42 43 1.0 56 1.0 57 1.0 |
| H     | 0                        | -2.41400000 | -1.24600000 | 3.43300000  | 43 53 1.0 54 1.0 55 1.0 |
| H     | 0                        | -2.74100000 | 0.00689772  | -4.55900000 | 44                      |
| H     | 0                        | -2.32100000 | -1.65000000 | -4.12400000 | 45                      |
| H     | 0                        | -3.79400000 | -1.34200000 | -5.08200000 | 46                      |
| H     | -1                       | 4.34900000  | 3.70100000  | -0.00827955 | 47                      |
| H     | -1                       | 1.19100000  | 3.72400000  | -0.32958075 | 48                      |
| H     | -1                       | 6.90200000  | -1.87400000 | 1.98800000  | 49                      |
| H     | -1                       | -1.75500000 | 5.14900000  | -1.30300000 | 50                      |
| H     | -1                       | 4.02400000  | -0.11676026 | 1.22800000  | 51                      |
| H     | -1                       | 2.30000000  | -3.76900000 | 2.46200000  | 52                      |
| H     | 0                        | -8.45000000 | 2.47400000  | -0.46268410 | 53                      |
| H     | 0                        | -6.90800000 | 2.66300000  | 0.35974909  | 54                      |
| H     | 0                        | -4.37900000 | -1.19400000 | 2.13400000  | 55                      |
| La    | 0                        | -3.90000000 | 0.86148825  | 0.01088327  | 56                      |
|       |                          |             |             |             | 57                      |
| 1 2   | 1.0 50 1.0 51 1.0 52 1.0 |             |             |             | 58                      |
| 2 3   | 1.5 4 1.5                |             |             |             | 59                      |
| 3 70  | 1.0                      |             |             |             | 60                      |
| 4 70  | 1.0                      |             |             |             | 61                      |
| 5 6   | 1.0 44 1.0 45 1.0 46 1.0 |             |             |             | 62                      |
| 6 7   | 2.0 8 1.5                |             |             |             | 63                      |
| 7 70  | 1.0                      |             |             |             | 64                      |
| 8 67  | 1.0 68 1.0               |             |             |             | 65                      |
| 9 10  | 1.0 47 1.0 48 1.0 49 1.0 |             |             |             | 66                      |
| 10 11 | 1.5 12 1.5               |             |             |             | 67                      |
| 11 70 | 1.0                      |             |             |             | 68                      |
| 12    |                          |             |             |             | 69                      |
| 13 14 | 1.0 58 1.0 59 1.0 60 1.0 |             |             |             | 70                      |
| 14 15 | 1.5 16 1.5               |             |             |             |                         |
| 15 70 | 1.0                      |             |             |             | C H N O O               |
| 16 70 | 1.0                      |             |             |             | 6-31G(d)                |
| 17 18 | 1.5 24 1.5 65 1.0        |             |             |             | ****                    |
| 18 19 | 1.0 22 1.5               |             |             |             | La 0                    |
| 19 20 | 1.5 21 2.0               |             |             |             | MWB46                   |
| 20 63 | 1.0                      |             |             |             | ****                    |
| 21    |                          |             |             |             |                         |
| 22 23 | 1.5 66 1.0               |             |             |             | La 0                    |
| 23 24 | 1.5 25 1.5               |             |             |             | MWB46                   |
| 24 40 | 1.0                      |             |             |             |                         |
| 25 26 | 2.0 27 1.0               |             |             |             |                         |

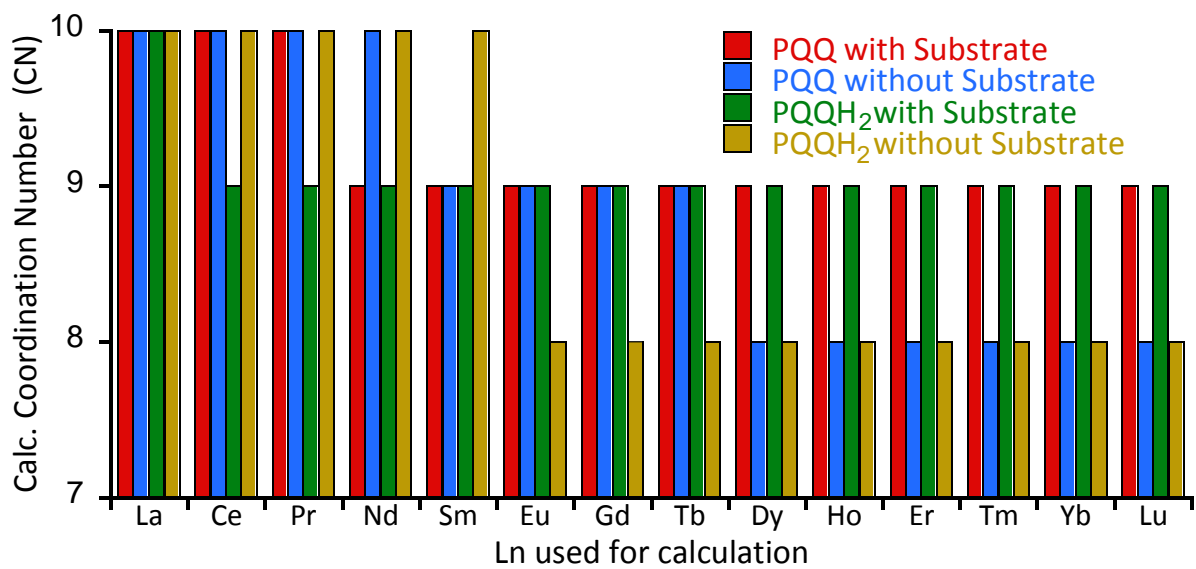

**Figure S4** Calculated coordination numbers of the active site in MDH with oxidized (PQQ) or reduced (PQQH<sub>2</sub>) cofactor with- and without substrate.

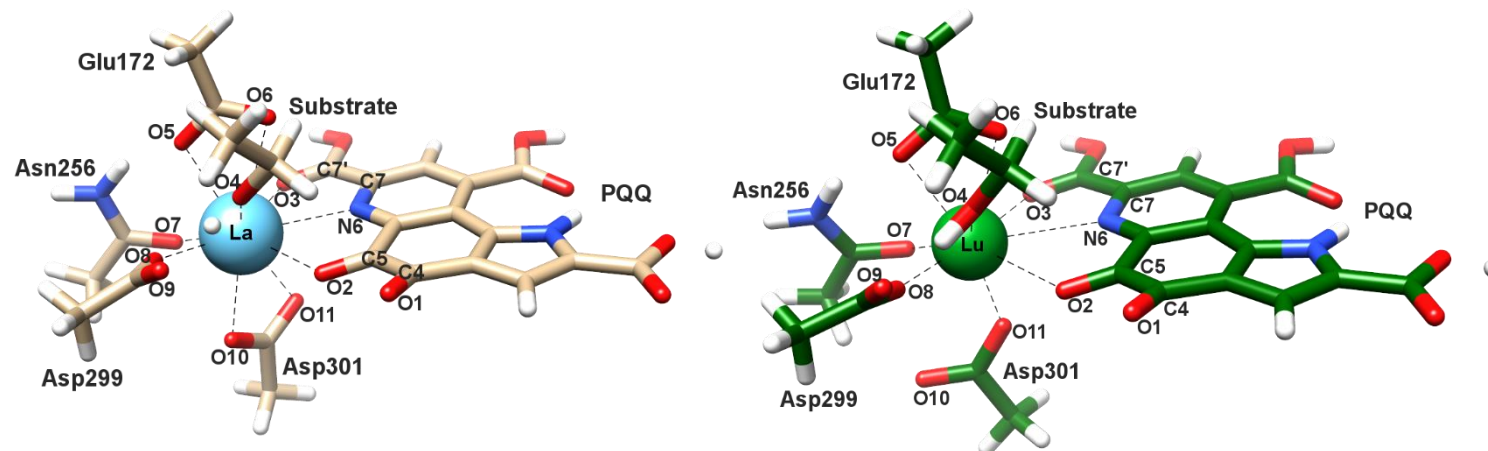

**Table S1** Calculated bond lengths and angles of the structure optimizations for Ln<sup>3+</sup> with PQQ<sup>0</sup> and substrate as described in Figure S2. Example structures of the La<sup>3+</sup> and Lu<sup>3+</sup> calculations are given above.

| PQQ + S | Distance<br>Substr.-O-C5 | Distance<br>Substr.-O-M | Distance<br>C5(O)-M | Distance<br>N6-M | Distance<br>C7'(CO <sub>2</sub> )-M | Distance<br>O10-M | Distance<br>O11-M | Bond angle<br>O10-M-O11 | Binding mode<br>(ASP301) | Binding mode<br>(ASP299) | CN | Atomic<br>number |
|---------|--------------------------|-------------------------|---------------------|------------------|-------------------------------------|-------------------|-------------------|-------------------------|--------------------------|--------------------------|----|------------------|
| La      | 3.41871                  | 2.66856                 | 2.77142             | 2.89968          | 2.70271                             | 2.64509           | 2.69935           | 48.99033                | bidentate                | monodentate              | 10 | 57               |
| Ce      | 3.41485                  | 2.66337                 | 2.76197             | 2.89762          | 2.70936                             | 2.63128           | 2.69154           | 49.14706                | bidentate                | monodentate              | 10 | 58               |
| Pr      | 3.41219                  | 2.65857                 | 2.75417             | 2.89826          | 2.71734                             | 2.61729           | 2.68469           | 49.29969                | bidentate                | monodentate              | 10 | 59               |
| Nd      | 3.41778                  | 2.61171                 | 2.8574              | 2.99031          | 2.73730                             | 3.49774           | 2.37672           | 39.70468                | monodentate              | monodentate              | 9  | 60               |
| Sm      | 3.41537                  | 2.59286                 | 2.86013             | 3.00451          | 2.75280                             | 3.59349           | 2.34644           | 37.85292                | monodentate              | monodentate              | 9  | 62               |
| Eu      | 3.41492                  | 2.58683                 | 2.8639              | 3.01475          | 2.76106                             | 3.60815           | 2.33595           | 37.51399                | monodentate              | monodentate              | 9  | 63               |
| Gd      | 3.41444                  | 2.58184                 | 2.8679              | 3.02469          | 2.76871                             | 3.61594           | 2.32783           | 37.31441                | monodentate              | monodentate              | 9  | 64               |
| Tb      | 3.41577                  | 2.57695                 | 2.87418             | 3.03645          | 2.77646                             | 3.62958           | 2.31973           | 37.00105                | monodentate              | monodentate              | 9  | 65               |
| Dy      | 3.41595                  | 2.57284                 | 2.88008             | 3.04880          | 2.78509                             | 3.63383           | 2.3123            | 36.86735                | monodentate              | monodentate              | 9  | 66               |
| Ho      | 3.41630                  | 2.56955                 | 2.88679             | 3.06206          | 2.79398                             | 3.63696           | 2.30498           | 36.75500                | monodentate              | monodentate              | 9  | 67               |
| Er      | 3.41718                  | 2.5667                  | 2.89434             | 3.07614          | 2.80304                             | 3.63804           | 2.29817           | 36.68542                | monodentate              | monodentate              | 9  | 68               |
| Tm      | 3.41814                  | 2.56512                 | 2.90226             | 3.08903          | 2.81036                             | 3.63908           | 2.29201           | 36.62292                | monodentate              | monodentate              | 9  | 69               |
| Yb      | 3.41893                  | 2.56333                 | 2.9108              | 3.10398          | 2.81956                             | 3.63864           | 2.2857            | 36.58582                | monodentate              | monodentate              | 9  | 70               |
| Lu      | 3.41938                  | 2.56218                 | 2.91864             | 3.11756          | 2.82784                             | 3.63362           | 2.28047           | 36.64844                | monodentate              | monodentate              | 9  | 71               |

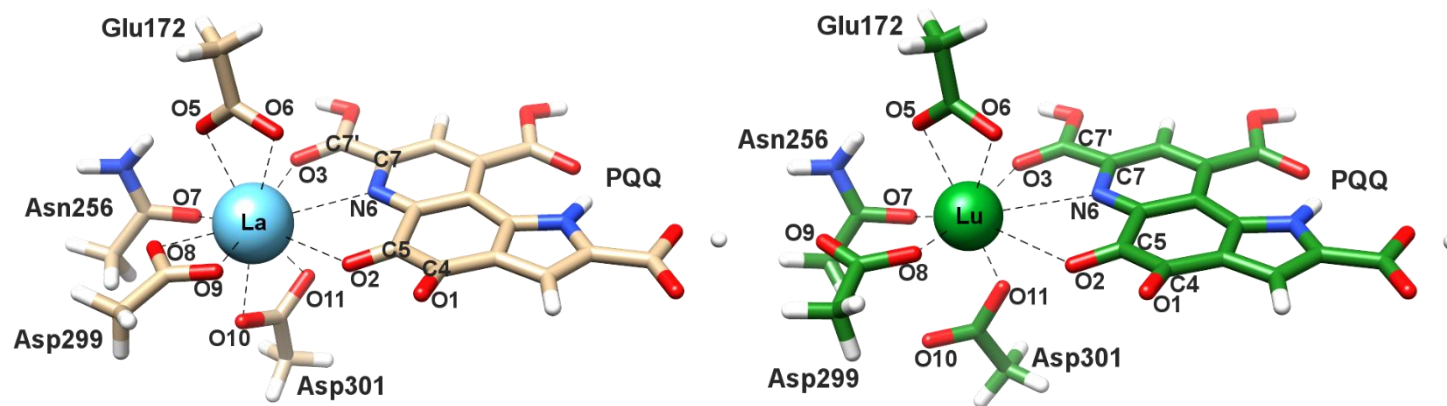

**Table S2** Calculated bond lengths and angles of the structure optimizations for Ln<sup>3+</sup> with PQQ<sup>0</sup> and without substrate as described in Figure S2. Example structures of the La<sup>3+</sup> and Lu<sup>3+</sup> calculations are given above.

| PQQ - S | Distance<br>C5(O)-M | Distance<br>N6-M | Distance<br>C7'(CO <sub>2</sub> )-M | Distance<br>O10-M | Distance<br>O11-M | Bond angle<br>O10-M-O11 | Binding mode<br>(ASP301) | Binding mode<br>(ASP299) | CN | Atomic<br>number |
|---------|---------------------|------------------|-------------------------------------|-------------------|-------------------|-------------------------|--------------------------|--------------------------|----|------------------|
| La      | 2.96030             | 3.20725          | 2.86410                             | 2.63074           | 2.59339           | 50.21016                | bidentate                | bidentate                | 10 | 57               |
| Ce      | 2.97706             | 3.22575          | 2.86963                             | 2.62193           | 2.57966           | 50.37921                | bidentate                | bidentate                | 10 | 58               |
| Pr      | 2.99437             | 3.24509          | 2.87580                             | 2.61454           | 2.56625           | 50.53544                | bidentate                | bidentate                | 10 | 59               |
| Nd      | 3.01204             | 3.26478          | 2.88222                             | 2.60951           | 2.5525            | 50.67674                | bidentate                | bidentate                | 10 | 60               |
| Sm      | 2.89771             | 3.03707          | 2.71801                             | 2.55847           | 2.5967            | 50.68474                | bidentate                | monodentate              | 9  | 62               |
| Eu      | 2.90947             | 3.04857          | 2.71891                             | 2.54712           | 2.59047           | 50.82384                | bidentate                | monodentate              | 9  | 63               |
| Gd      | 2.91986             | 3.05875          | 2.71977                             | 2.53707           | 2.58482           | 50.94776                | bidentate                | monodentate              | 9  | 64               |
| Tb      | 2.93182             | 3.07068          | 2.72104                             | 2.52512           | 2.57823           | 51.10283                | bidentate                | monodentate              | 9  | 65               |
| Dy      | 3.10597             | 3.18576          | 2.69915                             | 3.42002           | 2.29714           | 40.74210                | monodentate              | monodentate              | 8  | 66               |
| Ho      | 3.12665             | 3.20178          | 2.69759                             | 3.46268           | 2.2822            | 39.91409                | monodentate              | monodentate              | 8  | 67               |
| Er      | 3.14994             | 3.22022          | 2.69600                             | 3.48318           | 2.2708            | 39.48094                | monodentate              | monodentate              | 8  | 68               |
| Tm      | 3.19116             | 3.24933          | 2.68576                             | 3.42667           | 2.26154           | 40.50209                | monodentate              | monodentate              | 8  | 69               |
| Yb      | 3.21140             | 3.26725          | 2.68713                             | 3.44662           | 2.25019           | 40.08331                | monodentate              | monodentate              | 8  | 70               |
| Lu      | 3.22792             | 3.2828           | 2.68946                             | 3.45084           | 2.24257           | 39.96807                | monodentate              | monodentate              | 8  | 71               |

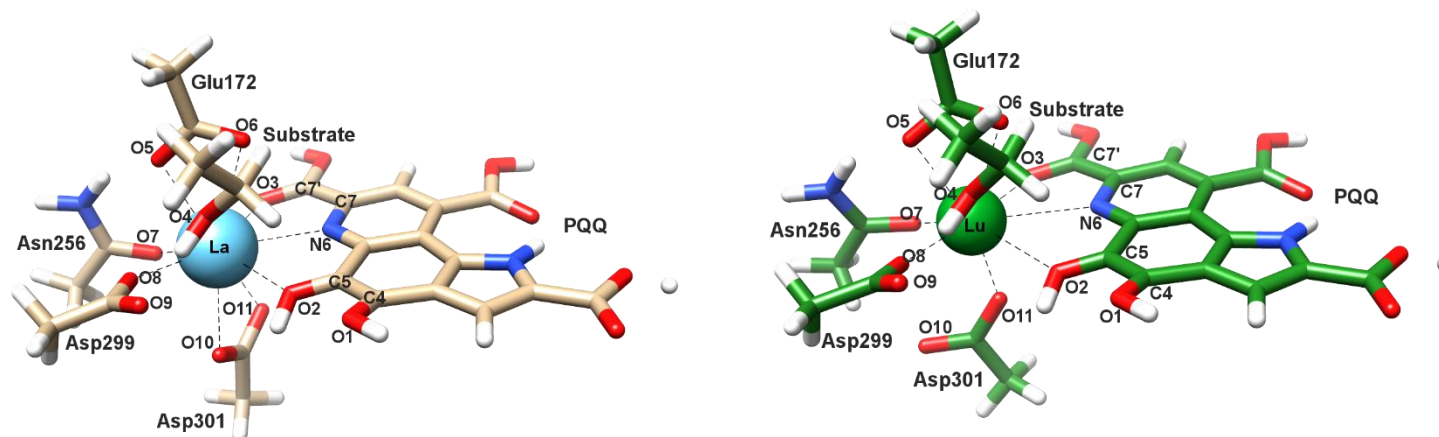

**Table S3** Calculated bond lengths and angles of the structure optimizations for Ln<sup>3+</sup> with reduced PQQH<sub>2</sub> and substrate as described in Figure S2. Example structures of the La<sup>3+</sup> and Lu<sup>3+</sup> calculations are given above.

| PQQH <sub>2</sub> + S | Distance Substr.-O-C5 | Distance Substr.-O-M | Distance C5(O)-M | Distance N6-M | Distance C7'(CO <sub>2</sub> )-M | Distance O10-M | Distance O11-M | Bond angle O10-M-O11 | Binding mode (ASP301) | Binding mode (ASP299) | CN | Atomic number |
|-----------------------|-----------------------|----------------------|------------------|---------------|----------------------------------|----------------|----------------|----------------------|-----------------------|-----------------------|----|---------------|
| La                    | 3.54092               | 2.70834              | 2.81254          | 2.86802       | 2.62451                          | 2.71244        | 2.66632        | 48.64818             | Bidentate             | monodentate           | 10 | 57            |
| Ce                    | 3.54946               | 2.63521              | 2.91106          | 2.95102       | 2.64007                          | 3.68944        | 2.40021        | 36.28487             | Monodentate           | monodentate           | 9  | 58            |
| Pr                    | 3.54064               | 2.63263              | 2.90953          | 2.95712       | 2.64814                          | 3.69075        | 2.3828         | 36.19016             | Monodentate           | monodentate           | 9  | 59            |
| Nd                    | 3.5334                | 2.62958              | 2.91074          | 2.96688       | 2.65772                          | 3.68653        | 2.36869        | 36.19823             | Monodentate           | monodentate           | 9  | 60            |
| Sm                    | 3.52661               | 2.62199              | 2.91926          | 2.98775       | 2.67306                          | 3.69495        | 2.34789        | 35.9033              | Monodentate           | monodentate           | 9  | 62            |
| Eu                    | 3.52627               | 2.62008              | 2.92709          | 2.99971       | 2.67872                          | 3.69484        | 2.33881        | 35.83736             | Monodentate           | monodentate           | 9  | 63            |
| Gd                    | 3.52663               | 2.61864              | 2.93476          | 3.01084       | 2.68363                          | 3.69327        | 2.33143        | 35.81268             | Monodentate           | monodentate           | 9  | 64            |
| Tb                    | 3.52582               | 2.61692              | 2.94434          | 3.02416       | 2.68955                          | 3.69751        | 2.32426        | 35.67653             | Monodentate           | monodentate           | 9  | 65            |
| Dy                    | 3.52649               | 2.61604              | 2.95369          | 3.03771       | 2.69576                          | 3.69566        | 2.3173         | 35.65926             | Monodentate           | monodentate           | 9  | 66            |
| Ho                    | 3.52752               | 2.61594              | 2.96397          | 3.05224       | 2.70222                          | 3.69367        | 2.31027        | 35.64429             | Monodentate           | monodentate           | 9  | 67            |
| Er                    | 3.52895               | 2.61629              | 2.97493          | 3.06762       | 2.70907                          | 3.69064        | 2.30366        | 35.65323             | Monodentate           | monodentate           | 9  | 68            |
| Tm                    | 3.53062               | 2.61775              | 2.98598          | 3.08189       | 2.71457                          | 3.68782        | 2.29767        | 35.66513             | Monodentate           | monodentate           | 9  | 69            |
| Yb                    | 3.53273               | 2.61924              | 2.99806          | 3.09834       | 2.72169                          | 3.68425        | 2.29139        | 35.68734             | Monodentate           | monodentate           | 9  | 70            |
| Lu                    | 3.53428               | 2.62061              | 3.0085           | 3.11303       | 2.72844                          | 3.67742        | 2.28598        | 35.78303             | Monodentate           | monodentate           | 9  | 71            |



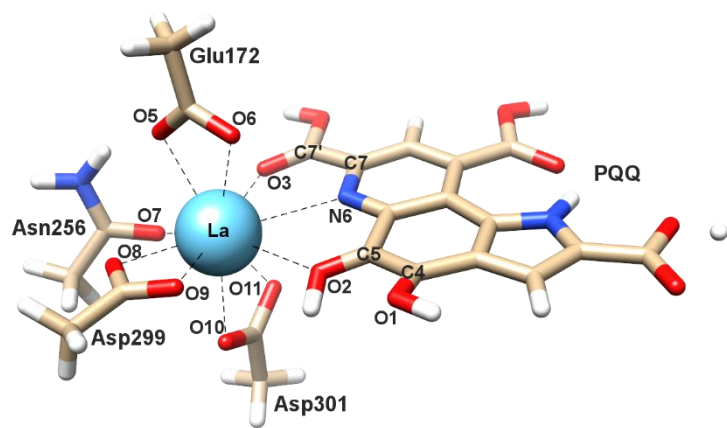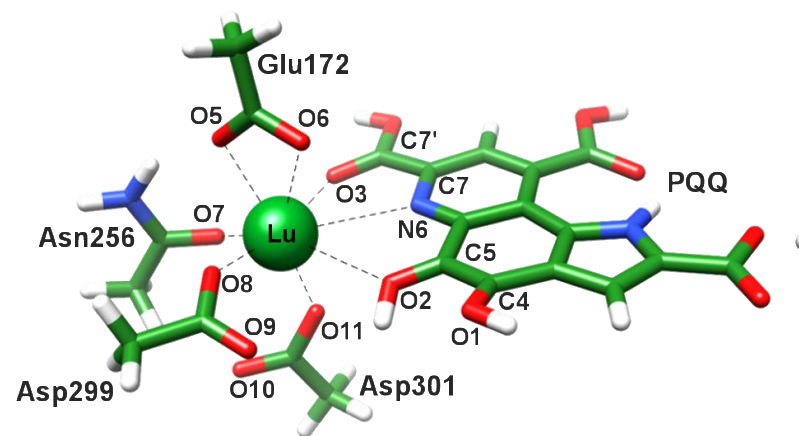

**Table S4** Calculated bond lengths and angles of the structure optimizations for Ln<sup>3+</sup> with reduced PQQH<sub>2</sub> and without substrate as described in Figure S2. Example structures of the La<sup>3+</sup> and Lu<sup>3+</sup> calculations are given above.

| PQQH <sub>2</sub> - S | Distance<br>C5(O)-M | Distance<br>N6-M | Distance<br>C7'(CO <sub>2</sub> )-M | Distance<br>O10-M | Distance<br>O11-M | Bond angle<br>O10-M-O11 | Binding mode<br>(ASP301) | Binding mode<br>(ASP299) | CN | Atomic<br>number |
|-----------------------|---------------------|------------------|-------------------------------------|-------------------|-------------------|-------------------------|--------------------------|--------------------------|----|------------------|
| La                    | 2.95742             | 3.13982          | 2.78158                             | 2.63361           | 2.60395           | 50.02797                | bidentate                | bidentate                | 10 | 57               |
| Ce                    | 2.97215             | 3.15675          | 2.78697                             | 2.62111           | 2.59302           | 50.20832                | bidentate                | bidentate                | 10 | 58               |
| Pr                    | 2.98586             | 3.17385          | 2.79371                             | 2.61024           | 2.58227           | 50.37431                | bidentate                | bidentate                | 10 | 59               |
| Nd                    | 3.00095             | 3.19184          | 2.80022                             | 2.6013            | 2.57175           | 50.52454                | bidentate                | bidentate                | 10 | 60               |
| Sm                    | 3.07479             | 3.2641           | 2.81502                             | 2.63305           | 2.51598           | 50.66503                | bidentate                | bidentate                | 10 | 62               |
| Eu                    | 3.03114             | 3.09536          | 2.66574                             | 3.4818            | 2.30303           | 39.60913                | monodentate              | monodentate              | 8  | 63               |
| Gd                    | 3.04624             | 3.10588          | 2.66276                             | 3.52863           | 2.28762           | 38.66039                | monodentate              | monodentate              | 8  | 64               |
| Tb                    | 3.06665             | 3.12128          | 2.66008                             | 3.56398           | 2.27436           | 37.90669                | monodentate              | monodentate              | 8  | 65               |
| Dy                    | 3.0875              | 3.13792          | 2.65814                             | 3.57228           | 2.26438           | 37.68103                | monodentate              | monodentate              | 8  | 66               |
| Ho                    | 3.10862             | 3.15511          | 2.65662                             | 3.57863           | 2.25469           | 37.49011                | monodentate              | monodentate              | 8  | 67               |
| Er                    | 3.12939             | 3.17266          | 2.65601                             | 3.57974           | 2.24588           | 37.40832                | monodentate              | monodentate              | 8  | 68               |
| Tm                    | 3.14776             | 3.18799          | 2.65536                             | 3.57983           | 2.23828           | 37.35706                | monodentate              | monodentate              | 8  | 69               |
| Yb                    | 3.16743             | 3.2055           | 2.65608                             | 3.57884           | 2.2299            | 37.31814                | monodentate              | monodentate              | 8  | 70               |
| Lu                    | 3.18277             | 3.22011          | 2.6578                              | 3.57202           | 2.22282           | 37.40757                | monodentate              | monodentate              | 8  | 71               |

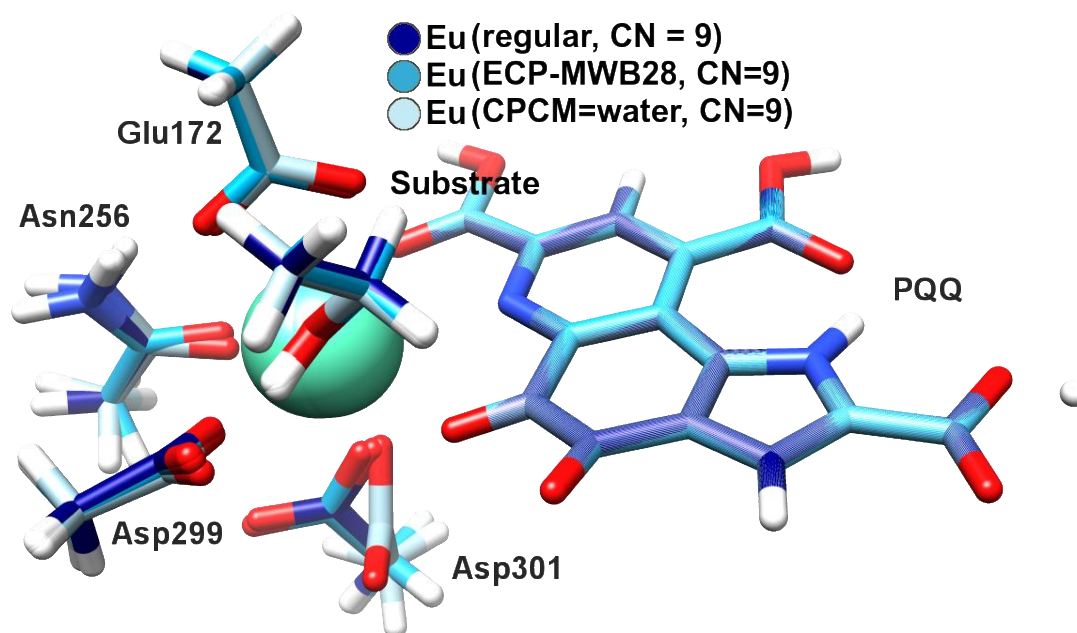

**Figure S5** Optimized and superimposed structures for the active center with PQQ, substrate and  $\text{Eu}^{3+}$ . The regular calculation, as described in Figure S2-S3 is given in dark blue. An open shell calculation, using the smaller ECP-MWB28<sup>[11-13]</sup> and taking the f-electrons into account is given in blue and a calculation, taking solvent effects into account, by using the CPCM method with water, is given in light blue. Input commands for the calculations are given below. The structures received from the calculations only differ slightly, with an exception of Asp301, which is tilted away under the influence of the solvent model (light blue). Since all calculations show the same coordination number – the property of interest - the simplified, “regular” calculations described above were used for every Ln and active site configuration. None of the calculations showed negative frequencies.

**Figure S6** Example inputs of the calculations described in Figure S2. **Left:** Open shell calculation, using the smaller ECP-MWB28. **Right:** Closed-shell calculation, considering solvent effects by the use of CPCM with water.

**Eu (ECP-MWB28)**

```
#p opt freq ub3lyp/gen geom=connectivity
5d 7f pseudo=read
```

0 7

Atomic coordinates and  
geometry specifications as in Figure S3

```
CHNOO
6-31G(d)
****
```

```
Eu 0
MWB28
****
```

```
Eu 0
MWB28
```

**Eu (CPCM=water)**

```
#p opt freq rb3lyp/gen scrf=(cpcm,solvent=water)
geom=connectivity 5d 7f pseudo=read
```

0 1

Atomic coordinates and  
geometry specifications as in Figure S3

```
CHNOO
6-31G(d)
****
```

```
Eu 0
MWB52
****
```

```
Eu 0
MWB52
```

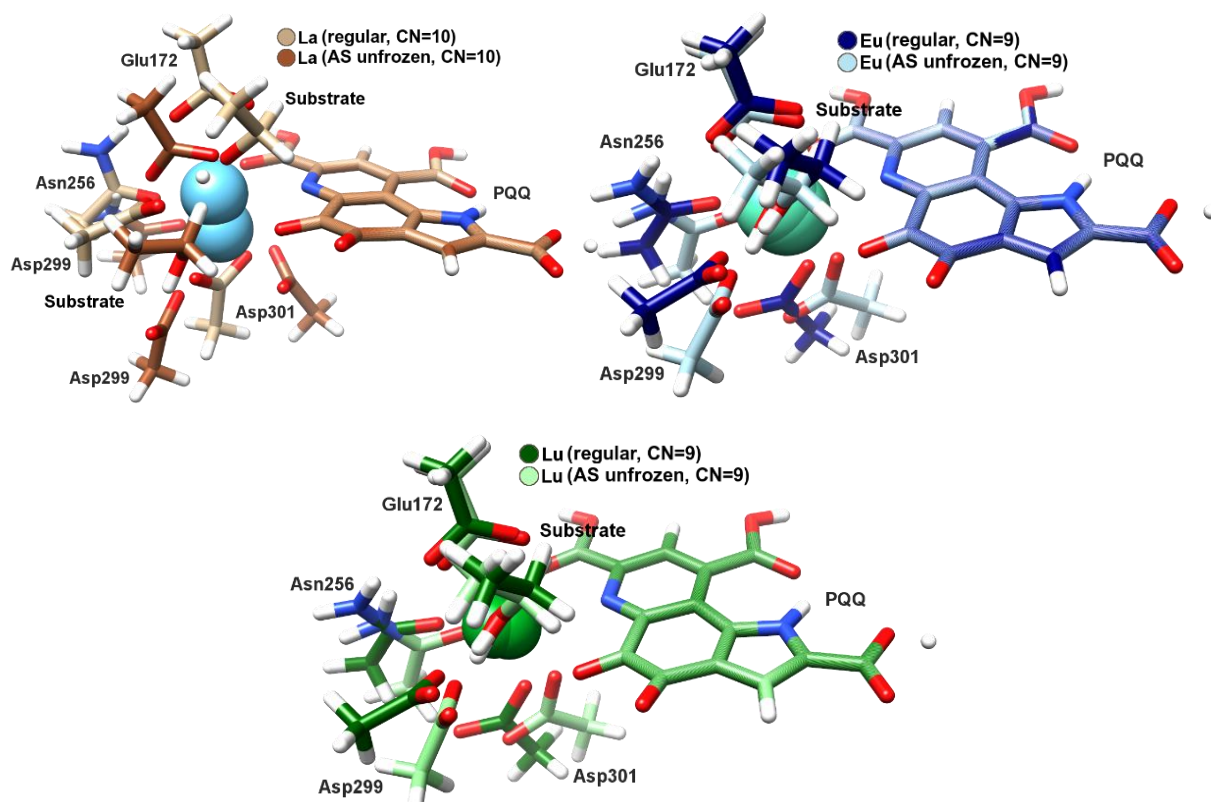

**Figure S7** Optimized and superimposed structures for the active center with PQQ, substrate and  $\text{La}^{3+}$ ,  $\text{Eu}^{3+}$  or  $\text{Lu}^{3+}$ . Calculations were performed exactly as the “regular” ones described in Figure S2-S3, but with all amino acid residues set to unfrozen. An example input command for the  $\text{La}^{3+}$  calculation is given below in Figure S8. Both Eu and Lu calculations only differ slightly from the regular ones. Glu172 and the substrate almost keep their position, while Asn256, Asp299 and Asp301 are shifted more significantly from their position. The unfrozen La calculation differs strongly from the regular one, with all amino acids, central metal and substrate rearranged. However, the coordination number for all three calculations does not differ from the respective regular calculation. The coordination number is therefore not forced by the frozen amino acids but only by the varying properties of the Ln. None of the calculations showed negative frequencies.

**Figure S8** Example input for Gaussian optimizations with all amino acids set to unfrozen (while keeping all PQQ atoms frozen). -1 denotes a frozen carbon atom.

```
%chk=LalII-PQQ-with-Substrate-not-frozen.chk
%mem=60GB
%nprocshared=8
#p opt freq rb3lyp/gen geom=connectivity 5d 7f pseudo=read

La(III) - PQQ - with Substrat
AS not frozen

0 1
C      0 -4.90400000  3.34400000  3.52500000
C      0 -4.43100000  2.75000000  2.21200000
O      0 -5.31600000  2.48300000  1.32700000
O      0 -3.21300000  2.47700000  2.02300000
C      0 -7.59200000  1.55900000 -2.75400000
C      0 -6.78400000  1.98800000 -1.55100000
O      0 -5.53400000  1.90100000 -1.57100000
N      0 -7.44100000  2.47100000 -0.49176943
C      0 -7.57000000 -2.04200000  0.45144469
C      0 -6.14900000 -1.61500000  0.75161945
O      0 -5.81500000 -0.46701986  0.29292243
O      0 -5.39000000 -2.35900000  1.42100000
C      0 -3.16200000 -0.96440872 -4.27600000
C      0 -3.96500000 -0.84870079 -2.97500000
O      0 -5.10800000 -1.31100000 -2.91900000
O      0 -3.34000000 -0.27056742 -1.98200000
N     -1  3.33000000 -0.81662988  1.47900000
C     -1  3.61300000 -2.05900000  1.97300000
C     -1  5.01500000 -2.49400000  2.20800000
O     -1  5.88200000 -1.54200000  1.91200000
O     -1  5.26800000 -3.61500000  2.62500000
C     -1  2.41800000 -2.74800000  2.13600000
C     -1  1.39400000 -1.87800000  1.71500000
C     -1  1.99200000 -0.65850047  1.29400000
C     -1 -0.03196565 -2.09600000  1.68300000
O     -1 -0.65585683 -3.02200000  2.17600000
C     -1 -0.80639866 -0.98447544  0.95671480
O     -1 -1.97200000 -1.16300000  0.63270177
C     -1 -0.13660882  0.31747211  0.63836618
N     -1 -0.97622754  1.23100000  0.17358237
C     -1 -0.50347008  2.43600000 -0.15877326
C     -1 -1.51600000  3.38500000 -0.69429278
O     -1 -2.68200000  3.07700000 -0.90161786
```



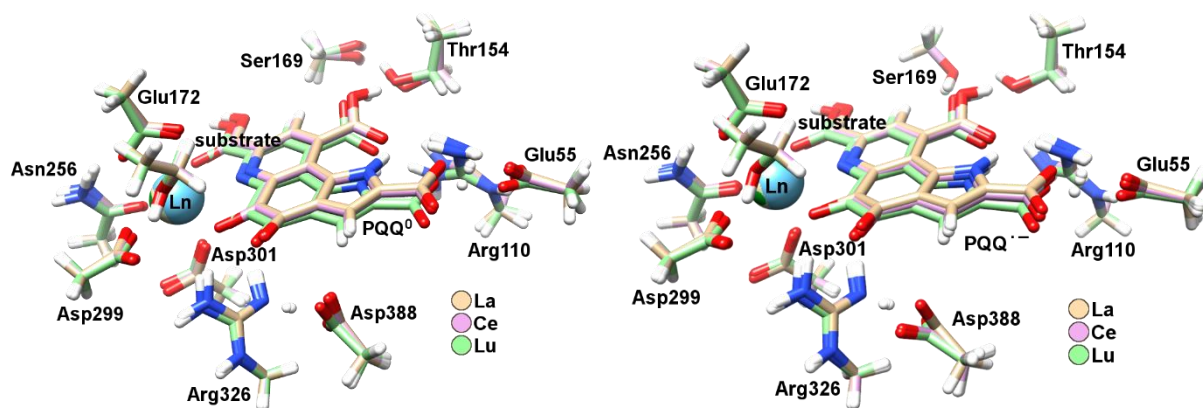

**Figure S9:** Optimized Structures for the extended active center with substrate and La (tan), Ce (purple) or Lu (green) with PQQ in the active quinone state ( $\text{PQQ}^0$  – left) or the resting semiquinone state ( $\text{PQQ}^{\bullet-}$  – right). Electronic-structure calculations were performed with Gaussian 09 and exactly as described by Schelter *et al.*<sup>[2]</sup> The B3LYP functional with the 6-31G(d) basis set was used for C, H, N and O. 28 electron quasi relativistic effective core potentials (ECP) and segmented basis sets were used for each central metal respectively (La, Ce, Lu): ECP-MWB28.<sup>[11-13]</sup> Starting point of the geometry optimization was the active site of the crystal structure of Ce-MDH isolated from SolV (4MAE).<sup>[10]</sup> The present amino acids in the active site were truncated and the terminal carbon atoms were frozen, to mimic the sterics imposed by the protein. The present polyethyleneglycol was truncated as well and used as a substrate-model. The conductor-like polarizable continuum model (CPCM) was used for water, with the default settings for the universal force field (UFF) and a dielectric constant of 4, to reproduce the interior of the protein and the active site pocket. The charge and multiplicity for the quinone  $\text{PQQ}^0$  state were set to “0 1” for La and Lu and to “0 2” for Ce. The additional electron for the semiquinone  $\text{PQQ}^{\bullet-}$  state was taken into account, by changing the system to “-1 2” for La and Lu and to “-1 3” for Ce. None of the calculations showed negative frequencies. All structures differed only slightly, by changing the central metal or the PQQ state. The PQQ ligand moved closer to the central metal, especially in case of Lu, probably due to the decreased ionic radius. In contrast to the simplified calculations described in Figure S2-S3, Asp301 remained monodentate for all calculations and therefore the overall coordination number did not change over the exchange of La to Ce or Lu. Since the simplified system given in S2 was also calculated with a smaller ECP and solvent effects as described in Figure S5, the binding mode of Asp301 is probably influenced during the optimization by the larger hydrogen bond network due to the additional amino acids and the change of the dielectric constant to 4.

**Figure S10** Example input for Gaussian optimizations (in this case  $\text{La}^{3+} \text{PQQ}^0$ ). -1 denotes a frozen carbon atom.

```

%chk=C:\Users\akdaumann\Desktop\La(III)-PQQ(0).chk
%mem=128GB
%nprocshared=12
#p opt=maxcycle=999 freq rb3lyp/gen
scrf=(cpcm,solvent=water,read)
geom=connectivity pseudo=read scf=maxcycles=1024
formcheck

La(III) - PQQ(0)

0 1
C -1 10.31100000 -2.74300000 0.91007048
C 0 8.93000000 -2.09500000 0.98227463
O 0 8.26200000 -2.29300000 2.04300000
O 0 8.55300000 -1.38000000 0.00969315
C -1 8.18300000 -0.06179479 -3.80000000
N 0 7.90300000 -0.03453109 -2.37100000
C 0 7.07000000 0.82769766 -1.78300000
N 0 6.37600000 1.73100000 -2.50700000
N 0 6.93100000 0.79380766 -0.44848331
C 0 7.08000000 4.45200000 -0.35938247
O 0 5.73400000 4.21400000 -0.86097367
C -1 7.09400000 5.43300000 0.80182198
C -1 2.43900000 6.91600000 -0.75832705
O 0 3.32900000 5.98400000 -1.38600000
C -1 -4.90400000 3.34400000 3.52500000
C 0 -4.43100000 2.75000000 2.21200000
O 0 -5.31600000 2.48300000 1.32700000
O 0 -3.21300000 2.47700000 2.02300000
C -1 -7.59200000 1.55900000 -2.75400000
C 0 -6.78400000 1.98800000 -1.55100000
O 0 -5.53400000 1.90100000 -1.57100000
N 0 -7.44100000 2.47100000 -0.49176943
C -1 -7.57000000 -2.04200000 0.45144469
C 0 -6.14900000 -1.61500000 0.75161945
O 0 -5.81500000 -0.46701986 0.29292243

```

|   |    |             |             |             |    |   |                                 |             |             |
|---|----|-------------|-------------|-------------|----|---|---------------------------------|-------------|-------------|
| O | 0  | -5.39000000 | -2.35900000 | 1.42100000  | H  | 0 | 2.84700000                      | 7.91400000  | -0.93492756 |
| C | -1 | -3.16200000 | -0.96440872 | -4.27600000 | H  | 0 | 1.43200000                      | 6.86500000  | -1.19300000 |
| C | 0  | -3.96500000 | -0.84870079 | -2.97500000 | H  | 0 | 2.36900000                      | 6.75000000  | 0.32496012  |
| O | 0  | -5.10800000 | -1.31100000 | -2.91900000 | H  | 0 | 11.07300000                     | -1.98700000 | 1.13500000  |
| O | 0  | -3.34000000 | -0.27056742 | -1.98200000 | H  | 0 | 10.40200000                     | -3.55600000 | 1.63300000  |
| N | 0  | 3.33000000  | -0.81662988 | 1.47900000  | H  | 0 | 10.50600000                     | -3.11500000 | -0.10037254 |
| C | 0  | 3.61300000  | -2.05900000 | 1.97300000  | H  | 0 | 2.95500000                      | 5.09900000  | -1.25100000 |
| C | 0  | 5.01500000  | -2.49400000 | 2.20800000  | H  | 0 | 4.34900000                      | 3.70100000  | -0.00827955 |
| O | 0  | 5.88200000  | -1.54200000 | 1.91200000  | H  | 0 | 5.34500000                      | 5.05500000  | -1.17800000 |
| O | 0  | 5.26800000  | -3.61500000 | 2.62500000  | H  | 0 | 5.98800000                      | 2.54800000  | -2.03600000 |
| C | 0  | 2.41800000  | -2.74800000 | 2.13600000  | H  | 0 | 6.58800000                      | 1.84500000  | -3.48700000 |
| C | 0  | 1.39400000  | -1.87800000 | 1.71500000  | H  | 0 | 6.08300000                      | 1.18200000  | -0.04770952 |
| C | 0  | 1.99200000  | -0.65850047 | 1.29400000  | H  | 0 | 7.36600000                      | -0.01798868 | 0.02169258  |
| C | 0  | -0.03196565 | -2.09600000 | 1.68300000  | H  | 0 | 8.34400000                      | -0.71492873 | -1.74500000 |
| O | 0  | -0.65585683 | -3.02200000 | 2.17600000  | H  | 0 | 1.19100000                      | 3.72400000  | -0.32958075 |
| C | 0  | -0.80639866 | -0.98447544 | 0.95671480  | H  | 0 | 6.90200000                      | -1.87400000 | 1.98800000  |
| O | 0  | -1.97200000 | -1.16300000 | 0.63270177  | H  | 0 | -1.75500000                     | 5.14900000  | -1.30300000 |
| C | 0  | -0.13660882 | 0.31747211  | 0.63836618  | H  | 0 | 4.02400000                      | -0.11676026 | 1.22800000  |
| N | 0  | -0.97622754 | 1.23100000  | 0.17358237  | H  | 0 | 2.30000000                      | -3.76900000 | 2.46200000  |
| C | 0  | -0.50347008 | 2.43600000  | -0.15877326 | H  | 0 | -3.08300000                     | -2.86900000 | 0.19805491  |
| C | 0  | -1.51600000 | 3.38500000  | -0.69429278 | H  | 0 | -4.17200000                     | -4.11700000 | -0.28136504 |
| O | 0  | -2.68200000 | 3.07700000  | -0.90161786 | H  | 0 | -1.44200000                     | -2.29500000 | -1.39100000 |
| O | 0  | -1.02900000 | 4.60100000  | -0.94685640 | H  | 0 | -0.41936651                     | -3.68700000 | -1.86600000 |
| C | 0  | 0.84871874  | 2.74100000  | -0.04652754 | H  | 0 | -3.17200000                     | -5.90700000 | -1.49000000 |
| C | 0  | 1.77100000  | 1.78600000  | 0.39850560  | H  | 0 | -8.45000000                     | 2.47400000  | -0.46268410 |
| C | 0  | 3.21000000  | 2.20900000  | 0.35976671  | H  | 0 | -6.90800000                     | 2.66300000  | 0.35974909  |
| O | 0  | 3.37200000  | 3.51000000  | 0.13590368  | H  | 0 | -4.37900000                     | -1.19400000 | 2.13400000  |
| O | 0  | 4.17700000  | 1.46400000  | 0.47970217  | La | 0 | -3.90000000                     | 0.86148825  | 0.01088327  |
| C | 0  | 1.28200000  | 0.49657896  | 0.78449450  |    |   |                                 |             |             |
| O | 0  | -3.93300000 | -0.32848794 | 2.35300000  |    |   | 1 2 1.0 101 1.0 102 1.0 103 1.0 |             |             |
| C | 0  | -3.16200000 | -0.45069210 | 3.55200000  |    |   | 2 3 1.5 4 1.5                   |             |             |
| C | -1 | -4.04600000 | -0.73580415 | 4.76200000  |    |   | 3                               |             |             |
| C | -1 | -1.81800000 | -5.63500000 | -3.12600000 |    |   | 4                               |             |             |
| N | 0  | -2.49200000 | -5.27000000 | -1.87800000 |    |   | 5 6 1.0 90 1.0 91 1.0 92 1.0    |             |             |
| C | 0  | -2.38200000 | -4.05700000 | -1.31700000 |    |   | 6 7 2.0 111 1.0                 |             |             |
| N | 0  | -1.38300000 | -3.25400000 | -1.70400000 |    |   | 7 8 1.0 9 1.0                   |             |             |
| N | 0  | -3.28000000 | -3.66000000 | -0.40296842 |    |   | 8 10 7 1.0 108 1.0              |             |             |
| C | -1 | 2.04400000  | -6.54300000 | -1.24900000 |    |   | 9 10 9 1.0 110 1.0              |             |             |
| C | 0  | 1.30700000  | -5.20800000 | -1.01900000 |    |   | 10 11 1.0 12 1.0 96 1.0 97 1.0  |             |             |
| O | 0  | 0.91595122  | -4.60900000 | -2.08800000 |    |   | 11 106 1.0                      |             |             |
| O | 0  | 1.10700000  | -4.82700000 | 0.15045621  |    |   | 12 93 1.0 94 1.0 95 1.0         |             |             |
| H | 0  | -7.34200000 | 2.20600000  | -3.60200000 |    |   | 13 14 1.0 98 1.0 99 1.0 100 1.0 |             |             |
| H | 0  | -7.28400000 | 0.54246200  | -3.01600000 |    |   | 14 104 1.0                      |             |             |
| H | 0  | -8.67000000 | 1.59400000  | -2.58300000 |    |   | 15 16 1.0 73 1.0 74 1.0 75 1.0  |             |             |
| H | 0  | -7.70800000 | -2.10900000 | -0.63361256 |    |   | 16 17 1.5 18 1.5                |             |             |
| H | 0  | -7.80300000 | -3.00600000 | 0.90925659  |    |   | 17 125 1.0                      |             |             |
| H | 0  | -8.26700000 | -1.28200000 | 0.82000108  |    |   | 18 125 1.0                      |             |             |
| H | 0  | -5.67800000 | 4.09600000  | 3.34900000  |    |   | 19 20 1.0 67 1.0 68 1.0 69 1.0  |             |             |
| H | 0  | -5.35100000 | 2.54500000  | 4.12900000  |    |   | 20 21 2.0 22 1.0                |             |             |
| H | 0  | -4.07300000 | 3.78100000  | 4.08500000  |    |   | 21 125 1.0                      |             |             |
| H | 0  | -4.78000000 | 0.06458975  | 4.90600000  |    |   | 22 122 1.0 123 1.0              |             |             |
| H | 0  | -4.58800000 | -1.67900000 | 4.63500000  |    |   | 23 24 1.0 70 1.0 71 1.0 72 1.0  |             |             |
| H | 0  | -3.43600000 | -0.81454479 | 5.67000000  |    |   | 24 25 1.5 26 1.5                |             |             |
| H | 0  | -2.63900000 | 0.50250317  | 3.66600000  |    |   | 25 125 1.0                      |             |             |
| H | 0  | -2.41400000 | -1.24600000 | 3.43300000  |    |   | 26                              |             |             |
| H | 0  | -2.74100000 | 0.00689772  | -4.55900000 |    |   | 27 28 1.0 81 1.0 82 1.0 83 1.0  |             |             |
| H | 0  | -2.32100000 | -1.65000000 | -4.12400000 |    |   | 28 29 1.5 30 1.5                |             |             |
| H | 0  | -3.79400000 | -1.34200000 | -5.08200000 |    |   | 29 125 1.0                      |             |             |
| H | 0  | -2.14000000 | -4.97600000 | -3.94100000 |    |   | 30 125 1.0                      |             |             |
| H | 0  | -0.73347419 | -5.57200000 | -3.01300000 |    |   | 31 32 1.5 38 1.5 115 1.0        |             |             |
| H | 0  | -2.10500000 | -6.66000000 | -3.36700000 |    |   | 32 33 1.0 36 1.5                |             |             |
| H | 0  | 2.70200000  | -6.48700000 | -2.12300000 |    |   | 33 34 1.0 35 2.0                |             |             |
| H | 0  | 2.62300000  | -6.83100000 | -0.36649540 |    |   | 34 113 1.0                      |             |             |
| H | 0  | 1.30600000  | -7.33200000 | -1.44700000 |    |   | 35                              |             |             |
| H | 0  | 8.60600000  | 0.88889236  | -4.14600000 |    |   | 36 37 1.5 116 1.0               |             |             |
| H | 0  | 8.91800000  | -0.84624694 | -3.98300000 |    |   | 37 38 1.5 39 1.0                |             |             |
| H | 0  | 7.28400000  | -0.29160738 | -4.38300000 |    |   | 38 54 1.0                       |             |             |
| H | 0  | 6.71300000  | 6.41500000  | 0.49706827  |    |   | 39 40 2.0 41 1.0                |             |             |
| H | 0  | 6.48200000  | 5.06400000  | 1.63100000  |    |   | 40                              |             |             |
| H | 0  | 8.11900000  | 5.56800000  | 1.16300000  |    |   | 41 42 2.0 43 1.0                |             |             |
| H | 0  | 7.69900000  | 4.80800000  | -1.19000000 |    |   | 42 125 1.0                      |             |             |
| H | 0  | 7.44400000  | 3.46900000  | -0.05527242 |    |   | 43 44 1.5 54 1.5                |             |             |

|                                |                        |
|--------------------------------|------------------------|
| 44 45 1.5 125 1.0              | 116                    |
| 45 46 1.0 49 1.5               | 117                    |
| 46 47 2.0 48 1.0               | 118                    |
| 47 125 1.0                     | 119                    |
| 48 114 1.0                     | 120                    |
| 49 50 1.5 112 1.0              | 121                    |
| 50 51 1.0 54 1.5               | 122                    |
| 51 52 1.0 53 2.0               | 123                    |
| 52 105 1.0                     | 124                    |
| 53                             | 125                    |
| 54                             |                        |
| 55 56 1.0 124 1.0 125 1.0      | C H N O O              |
| 56 57 1.0 79 1.0 80 1.0        | 6-31G(d)               |
| 57 76 1.0 77 1.0 78 1.0        | ****                   |
| 58 59 1.0 84 1.0 85 1.0 86 1.0 | La 0                   |
| 59 60 2.0 121 1.0              | S 5 1.00               |
| 60 61 1.0 62 1.0               | 60228.6130000 0.000003 |
| 61 119 1.0 120 1.0             | 7142.4190000 0.000035  |
| 62 117 1.0 118 1.0             | 1034.3051000 0.000329  |
| 63 64 1.0 87 1.0 88 1.0 89 1.0 | 563.4427000 -0.000106  |
| 64 65 1.5 66 1.5               | 123.5532000 0.003280   |
| 65                             | S 1 1.00               |
| 66                             | 34.5544000 1.0         |
| 67                             | S 1 1.00               |
| 68                             | 24.6330000 1.0         |
| 69                             | S 1 1.00               |
| 70                             | 11.2660000 1.0         |
| 71                             | S 1 1.00               |
| 72                             | 2.9062000 1.0          |
| 73                             | S 1 1.00               |
| 74                             | 1.5433000 1.0          |
| 75                             | S 1 1.00               |
| 76                             | 0.5672000 1.0          |
| 77                             | S 1 1.00               |
| 78                             | 0.2539000 1.0          |
| 79                             | S 1 1.00               |
| 80                             | 0.0467000 1.0          |
| 81                             | S 1 1.00               |
| 82                             | 0.0200000 1.0          |
| 83                             | P 6 1.00               |
| 84                             | 3966.3547000 0.000004  |
| 85                             | 1143.9280000 0.000033  |
| 86                             | 446.9977000 0.000034   |
| 87                             | 229.5466000 0.000362   |
| 88                             | 27.3267000 -0.007136   |
| 89                             | 19.4864000 0.206654    |
| 90                             | P 1 1.00               |
| 91                             | 13.9024000 1.0         |
| 92                             | P 1 1.00               |
| 93                             | 4.2361000 1.0          |
| 94                             | P 1 1.00               |
| 95                             | 2.2936000 1.0          |
| 96                             | P 1 1.00               |
| 97                             | 1.1258000 1.0          |
| 98                             | P 1 1.00               |
| 99                             | 0.5279000 1.0          |
| 100                            | P 1 1.00               |
| 101                            | 0.2292000 1.0          |
| 102                            | P 1 1.00               |
| 103                            | 0.0800000 1.0          |
| 104                            | D 6 1.00               |
| 105                            | 367.7157000 0.000074   |
| 106                            | 113.5768000 0.000612   |
| 107                            | 33.5588000 0.007687    |
| 108                            | 14.4198000 -0.076510   |
| 109                            | 7.3159000 0.151754     |
| 110                            | 3.9483000 0.421873     |
| 111                            | D 1 1.00               |
| 112                            | 2.0150000 1.0          |
| 113                            | D 1 1.00               |
| 114                            | 0.9581000 1.0          |
| 115                            | D 1 1.00               |

```

0.3109000 1.0
D 1 1.0
0.0954000 1.0
F 5 1.0
124.7971000 0.001150
43.9427000 0.014333
19.2668000 0.062594
8.4893000 0.164000
3.7672000 0.285863
F 1 1.0
1.5902000 1.0
F 1 1.0
0.6098000 1.0
F 1 1.0
0.1973000 1.0
G 4 1.0
19.2668000 -0.002118
8.4893000 0.026709
3.7672000 -0.029667
1.5902000 0.282785
G 1 1.0
0.6098000 1.0
G 1 1.0
0.1973000 1.0
****

La 0
ECP28MWB 5 28
H-Komponente
1
2 1.000000 0.000000
S-H
1
2 19.441418 585.201953
P-H
1
2 16.016353 330.109510
D-H
1
2 15.128259 186.058232
F-H
1
2 23.103875 -49.433352
G-H
1
2 15.639020 -20.123020

stoichiometry=H2O1
solventname=water
eps=4.0

```

**Figure S11** Input for the calculation of the  $\text{La}^{3+}$   $\text{PQQ}^{\bullet-}$  species.

For the semiquinone  $\text{PQQ}^{\bullet-}$  species, following modification was implemented, while the rest of the input file was unchanged to figure S10:

```

#p opt=maxcycle=999 freq ub3lyp/gen scrf=(cpcm,solvent=water,read)
geom=connectivity formcheck pseudo=read scf=maxcycles=1024

```

La(III) - PQQ(-1)

-1 2



**Figure S12** Input for the calculation of the Ce<sup>3+</sup> and Lu<sup>3+</sup> variants of the PQQ<sup>0</sup> species. For the semiquinone PQQ<sup>-</sup> species, the input files were exactly the same, but the charge and multiplicity were changed to -1 3 for Ce<sup>3+</sup> and -1 2 for Lu<sup>3+</sup>.

```

Ce3+ PQQ0
#p opt(maxcycle=999) freq ub3lyp/gen
scrf=(cpcm,solvent=water,read)
geom=connectivity scf=maxcycles=1024 pseudo=read

Ce(III) - PQQ(0)
0 2

Atomic coordinates and
geometry specifications as in Figure S10

C H N O O
6-31G(d)
****
Ce O
S 5 1.00
66920.6810000 0.000005
7142.4190000 0.000062
1149.2279000 0.000408
626.0474000 0.000080
137.2813000 0.003559
S 1 1.00
36.6434000 1.0
S 1 1.00
25.9742000 1.0
S 1 1.00
11.8859000 1.0
S 1 1.00
3.0284000 1.0
S 1 1.00
1.5664000 1.0
S 1 1.00
0.5937000 1.0
S 1 1.00
0.2630000 1.0
S 1 1.00
0.0490000 1.0
S 1 1.00
0.0207000 1.0
P 6 1.00
3813.8026000 0.000005
1216.9447000 0.000051
496.6641000 0.000053
212.5431000 0.000671
27.6306000 0.008805
19.6040000 0.150861
P 1 1.00
13.8918000 1.0
P 1 1.00
4.4389000 1.0
P 1 1.00
2.3374000 1.0
P 1 1.00
1.1067000 1.0
P 1 1.00
0.5287000 1.0
P 1 1.00
0.2305000 1.0
P 1 1.00

0.0800000 1.0
D 6 1.00
367.7157000 0.000120
109.8798000 0.000991
36.0211000 0.007778
14.7637000 -0.062958
7.3281000 0.180342
3.9441000 0.432529
D 1 1.00
2.0202000 1.0
D 1 1.00
0.9649000 1.0
D 1 1.00
0.3273000 1.0
D 1 1.00
0.1032000 1.0
F 5 1.00
123.4821000 0.001566
43.9881000 0.018101
19.4518000 0.076157
8.6013000 0.192683
3.8049000 0.324332
F 1 1.00
1.6176000 1.0
F 1 1.00
0.6364000 1.0
F 1 1.00
0.2164000 1.0
G 4 1.00
19.4518000 0.002199
8.6013000 0.037428
3.8049000 0.030378
1.6176000 0.355664
G 1 1.00
0.6364000 1.0
G 1 1.00
0.2164000 1.0
****

Ce O
ECP28MWB 5 28
H-Komponente
1
2 1.000000 0.000000
S-H
1
2 20.137829 580.083457
P-H
1
2 15.998482 310.302833
D-H
1
2 14.974187 167.813944
F-H
1
2 23.402455 -49.390229
G-H
1
2 16.570553 -21.331879

stoichiometry=H2O1
solventname=water
eps=4.0

```

## Lu<sup>3+</sup> PQQ<sup>0</sup>

```
#p opt=maxcycle=999 freq rb3lyp/gen
scrf=(cpcm,solvent=water,read) geom=connectivity
pseudo=read scf=maxcycles=1024 formcheck

Lu(III) - PQQ(0)

0 1
Atomic coordinates and
geometry specifications as in Figure S10

C H N O O
6-31G(d)
****
Lu O
S 5 1.00
95169.7670000 0.000022
15488.4030000 0.000145
3776.2335000 0.000651
1079.0501000 0.002038
268.9538000 0.005127
S 1 1.00
63.4679000 1.0
S 1 1.00
45.1332000 1.0
S 1 1.00
21.4568000 1.0
S 1 1.00
5.3483000 1.0
S 1 1.00
2.6778000 1.0
S 1 1.00
1.0287000 1.0
S 1 1.00
0.4408000 1.0
S 1 1.00
0.0791000 1.0
S 1 1.00
0.0313000 1.0
P 6 1.00
4043.9748000 0.000294
958.8771000 0.002353
309.1220000 0.010441
114.2203000 0.025828
37.1091000 0.085047
20.4579000 -0.200371
P 1 1.00
14.5932000 1.0
P 1 1.00
6.527500 1.0
P 1 1.00
3.2448000 1.0
P 1 1.00
1.4504000 1.0
P 1 1.00
0.6635000 1.0
P 1 1.00
0.2858000 1.0
P 1 1.00
0.080000 1.0
D 6 1.00
484.5275000 0.002286

146.6655000 0.018629
56.3779000 0.074088
23.6711000 0.161554
9.4401000 0.308091
4.3712000 0.448334
D 1 1.00
1.9580000 1.0
D 1 1.00
0.7272000 1.0
D 1 1.00
0.2460000 1.0
D 1 1.00
0.0744000 1.0
F 5 1.00
175.1559000 0.004102
62.8909000 0.039086
28.3624000 0.147044
13.2478000 0.271092
6.1440000 0.345665
F 1 1.00
2.7623000 1.0
F 1 1.00
1.1574000 1.0
F 1 1.00
0.4244000 1.0
G 4 1.00
28.3624000 0.047905
13.2478000 0.150128
6.1440000 0.322911
2.7623000 0.444494
G 1 1.00
1.1574000 1.0
G 1 1.00
0.4244000 1.0
****

Lu O
ECP28MWB 5 28
H-Komponente
1
2 1.000000 0.000000
S-H
1
2 35.162097 989.995584
P-H
1
2 19.464402 278.865652
D-H
1
2 10.006865 71.009178
F-H
1
2 23.517932 -47.405890
G-H
1
2 29.412238 -35.557146

stoichiometry=H2O1
solventname=water
eps=4.0
```

**Table S5:** Location of highest electron density and energy values of the calculated molecular orbitals (MO) for the calculations given in Figure S9.

| Number                                 | Orbital | Location of highest e <sup>-</sup> density | Additional e <sup>-</sup> density | Energy   |          |          |
|----------------------------------------|---------|--------------------------------------------|-----------------------------------|----------|----------|----------|
|                                        |         |                                            |                                   | Hartrees | eV       | kJ/mol   |
| <b>La<sup>3+</sup> PQQ<sup>0</sup></b> |         |                                            |                                   |          |          |          |
| 265                                    | HOMO-3  | Asp388                                     | Asp301 + Arg326                   | -0.23192 | -6.31087 | -608.906 |
| 266                                    | HOMO-2  | Asp301                                     | Asp388                            | -0.23137 | -6.29590 | -607.462 |
| 267                                    | HOMO-1  | Asp388                                     | Arg326                            | -0.22645 | -6.16202 | -594.544 |
| 268                                    | HOMO    | Asp388                                     | -                                 | -0.21038 | -5.72473 | -552.353 |
| 269                                    | LUMO    | PQQ                                        | -                                 | -0.14161 | -3.85341 | -371.797 |
| 270                                    | LUMO+1  | PQQ                                        | -                                 | -0.11693 | -3.18183 | -307.000 |
| <b>La<sup>3+</sup> PQQ<sup>-</sup></b> |         |                                            |                                   |          |          |          |
| 266-a                                  | HOMO-3  | PQQ                                        | Asp388                            | -0.22487 | -6.11903 | -590.396 |
| 266-b                                  | HOMO-2  | Asp388                                     | Arg326 + PQQ                      | -0.22295 | -6.06678 | -585.355 |
| 267-a                                  | HOMO-2  | Asp388                                     | Arg326                            | -0.22282 | -6.06324 | -585.014 |
| 267-b                                  | HOMO-3  | PQQ                                        | Arg326 + Asp388                   | -0.22212 | -6.04420 | -583.176 |
| 268-a                                  | HOMO-1  | Asp388                                     | -                                 | -0.20769 | -5.65154 | -545.290 |
| 268-b                                  | HOMO-1  | Asp388                                     | -                                 | -0.20768 | -5.65126 | -545.264 |
| 269-a                                  | HOMO    | PQQ                                        | -                                 | -0.17401 | -4.73506 | -456.863 |
| 269-b                                  | LUMO    | PQQ                                        | -                                 | -0.10397 | -2.82917 | -272.973 |
| 270-a                                  | LUMO+1  | PQQ                                        | -                                 | -0.10276 | -2.79624 | -269.796 |
| <b>Ce<sup>3+</sup> PQQ<sup>0</sup></b> |         |                                            |                                   |          |          |          |
| 266-b                                  | HOMO-3  | Asp388                                     | Asp301                            | -0.23159 | -6.30189 | -608.040 |
| 266-a                                  | HOMO-3  | Asp388                                     | Asp301                            | -0.23158 | -6.30162 | -608.013 |
| 267-b                                  | HOMO-2  | Asp388                                     | Arg326                            | -0.22657 | -6.16529 | -594.860 |
| 267-a                                  | HOMO-2  | Asp388                                     | Arg326                            | -0.22657 | -6.16529 | -594.860 |
| 268-b                                  | HOMO-1  | Asp388                                     | -                                 | -0.21046 | -5.72691 | -552.563 |
| 268-a                                  | HOMO-1  | Asp388                                     | -                                 | -0.21046 | -5.72691 | -552.563 |
| 269-a                                  | SOMO    | Ce <sup>3+</sup>                           | -                                 | -0.19763 | -5.37779 | -518.878 |
| 269-b                                  | LUMO    | PQQ                                        | -                                 | -0.14155 | -3.85177 | -371.640 |
| 270-a                                  | LUMO    | PQQ                                        | -                                 | -0.14155 | -3.85177 | -371.640 |
| 270-b                                  | LUMO+1  | PQQ                                        | -                                 | -0.11667 | -3.17475 | -306.317 |
| 271-a                                  | LUMO+1  | PQQ                                        | -                                 | -0.11671 | -3.17584 | -306.422 |
| <b>Ce<sup>3+</sup> PQQ<sup>-</sup></b> |         |                                            |                                   |          |          |          |
| 266-a                                  | HOMO-3  | PQQ                                        | -                                 | -0.22722 | -6.18297 | -596.566 |
| 266-b                                  | HOMO-3  | PQQ                                        | -                                 | -0.22373 | -6.08801 | -587.403 |
| 267-a                                  | HOMO-2  | Asp388                                     | Arg326                            | -0.22237 | -6.05100 | -583.832 |
| 267-b                                  | HOMO-2  | Asp388                                     | Arg326                            | -0.22235 | -6.05045 | -583.780 |
| 268-a                                  | HOMO-1  | Asp388                                     | -                                 | -0.20890 | -5.68446 | -548.467 |
| 268-b                                  | HOMO-1  | Asp388                                     | -                                 | -0.20885 | -5.68310 | -548.336 |
| 269-a                                  | SOMO    | Ce <sup>3+</sup>                           | -                                 | -0.18258 | -4.96826 | -479.364 |
| 270-a                                  | HOMO    | PQQ                                        | Ce <sup>3+</sup>                  | -0.17564 | -4.77941 | -461.143 |
| 269-b                                  | LUMO    | PQQ                                        | -                                 | -0.10564 | -2.87461 | -277.358 |
| 270-b                                  | LUMO+1  | PQQ                                        | -                                 | -0.09881 | -2.68876 | -259.426 |
| <b>Lu<sup>3+</sup> PQQ<sup>0</sup></b> |         |                                            |                                   |          |          |          |
| 272                                    | HOMO-3  | Asp388                                     | Arg326 + PQQ                      | -0.23099 | -6.28556 | -606.464 |
| 273                                    | HOMO-2  | Asp388                                     | Arg326 + Asp301                   | -0.22661 | -6.16638 | -594.965 |
| 274                                    | HOMO-1  | Asp301                                     | -                                 | -0.22574 | -6.14270 | -592.680 |
| 275                                    | HOMO    | Asp388                                     | -                                 | -0.21016 | -5.71875 | -551.775 |
| 276                                    | LUMO    | PQQ                                        | -                                 | -0.14311 | -3.89422 | -375.735 |
| 277                                    | LUMO+1  | PQQ                                        | -                                 | -0.11684 | -3.17938 | -306.763 |
| <b>Lu<sup>3+</sup> PQQ<sup>-</sup></b> |         |                                            |                                   |          |          |          |
| 273-a                                  | HOMO-3  | Asp388                                     | Arg326                            | -0.22188 | -6.03767 | -582.546 |
| 273-b                                  | HOMO-3  | Asp388                                     | Arg326                            | -0.22187 | -6.03739 | -582.520 |
| 274-a                                  | HOMO-2  | Asp301                                     | -                                 | -0.22005 | -5.98787 | -577.741 |
| 274-b                                  | HOMO-2  | Asp301                                     | -                                 | -0.21990 | -5.98379 | -577.347 |
| 275-a                                  | HOMO-1  | Asp388                                     | -                                 | -0.20811 | -5.66296 | -546.393 |
| 275-b                                  | HOMO-1  | Asp388                                     | -                                 | -0.20806 | -5.66160 | -546.262 |
| 276-a                                  | HOMO    | PQQ                                        | -                                 | -0.17618 | -4.79410 | -462.561 |
| 276-b                                  | LUMO    | PQQ                                        | -                                 | -0.10606 | -2.88604 | -278.461 |
| 277-a                                  | LUMO+1  | PQQ                                        | -                                 | -0.10285 | -2.79869 | -270.033 |

1 Hartree ~ 27.2114 eV ~ 2625.50 kJ·mol<sup>-1</sup>.<sup>[15]</sup>

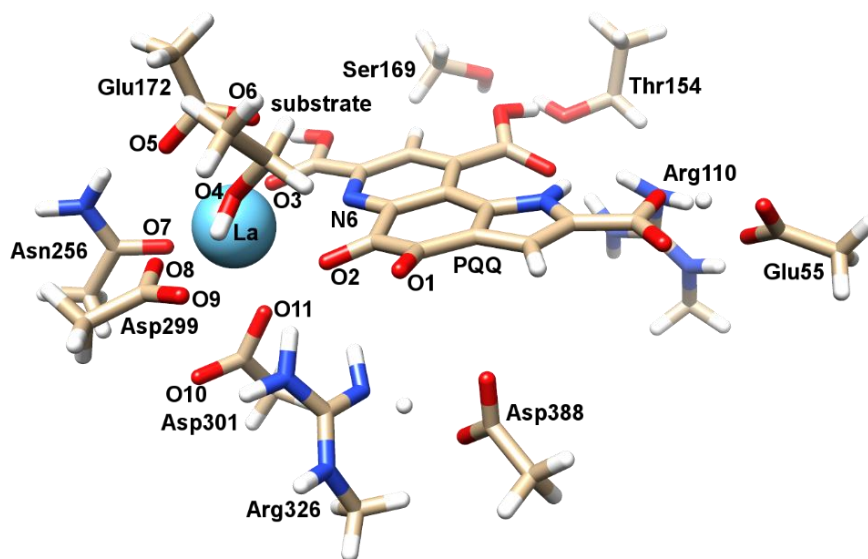

**Table S6** Ln-ligand distances [ $\text{\AA}$ ] for the active site calculations given in Figure S9.

|              | La-PQQ <sup>0</sup> | La-PQQ <sup>-</sup> | Ce-PQQ <sup>0</sup> | Ce-PQQ <sup>-</sup> | Lu-PQQ <sup>0</sup> | Lu-PQQ <sup>-</sup> |
|--------------|---------------------|---------------------|---------------------|---------------------|---------------------|---------------------|
| PQQ O2       | 2.88072             | 2.61357             | 2.86311             | 2.59050             | 2.72515             | 2.43018             |
| PQQ N6       | 2.96958             | 2.85159             | 2.94383             | 2.81733             | 2.73335             | 2.63617             |
| PQQ O3       | 2.71471             | 2.76245             | 2.69047             | 2.73264             | 2.49334             | 2.55311             |
| Substrate O4 | 2.63346             | 2.65730             | 2.63014             | 2.66181             | 2.59689             | 2.57834             |
| Glu172 O5    | 2.54295             | 2.56530             | 2.52417             | 2.55965             | 2.41993             | 2.44482             |
| Glu172 O6    | 2.67813             | 2.71147             | 2.66758             | 2.65592             | 2.55701             | 2.67900             |
| Asn256 O7    | 2.53227             | 2.61032             | 2.50117             | 2.58137             | 2.28928             | 2.39758             |
| Asp299 O8    | 2.39335             | 2.44359             | 2.35205             | 2.38363             | 2.17319             | 2.21431             |
| Asp301 O10   | 3.86233             | 4.08612             | 3.84750             | 3.98604             | 3.73898             | 3.80749             |
| Asp301 O11   | 2.38081             | 2.36061             | 2.35938             | 2.33516             | 2.30894             | 2.28001             |

**Table S7** Visualization of the frontier orbitals for the calculations given in Figure S9. In all cases, the LUMO of the  $\text{PQQ}^0$  species and the HOMO of the  $\text{PQQ}^{\bullet-}$  species seem to be the same PQQ related orbital. In case of  $\text{La}^{3+}$  and  $\text{Lu}^{3+}$ , the sign of the orbital wave function changes, probably due to the change from a closed- to an open shell system.

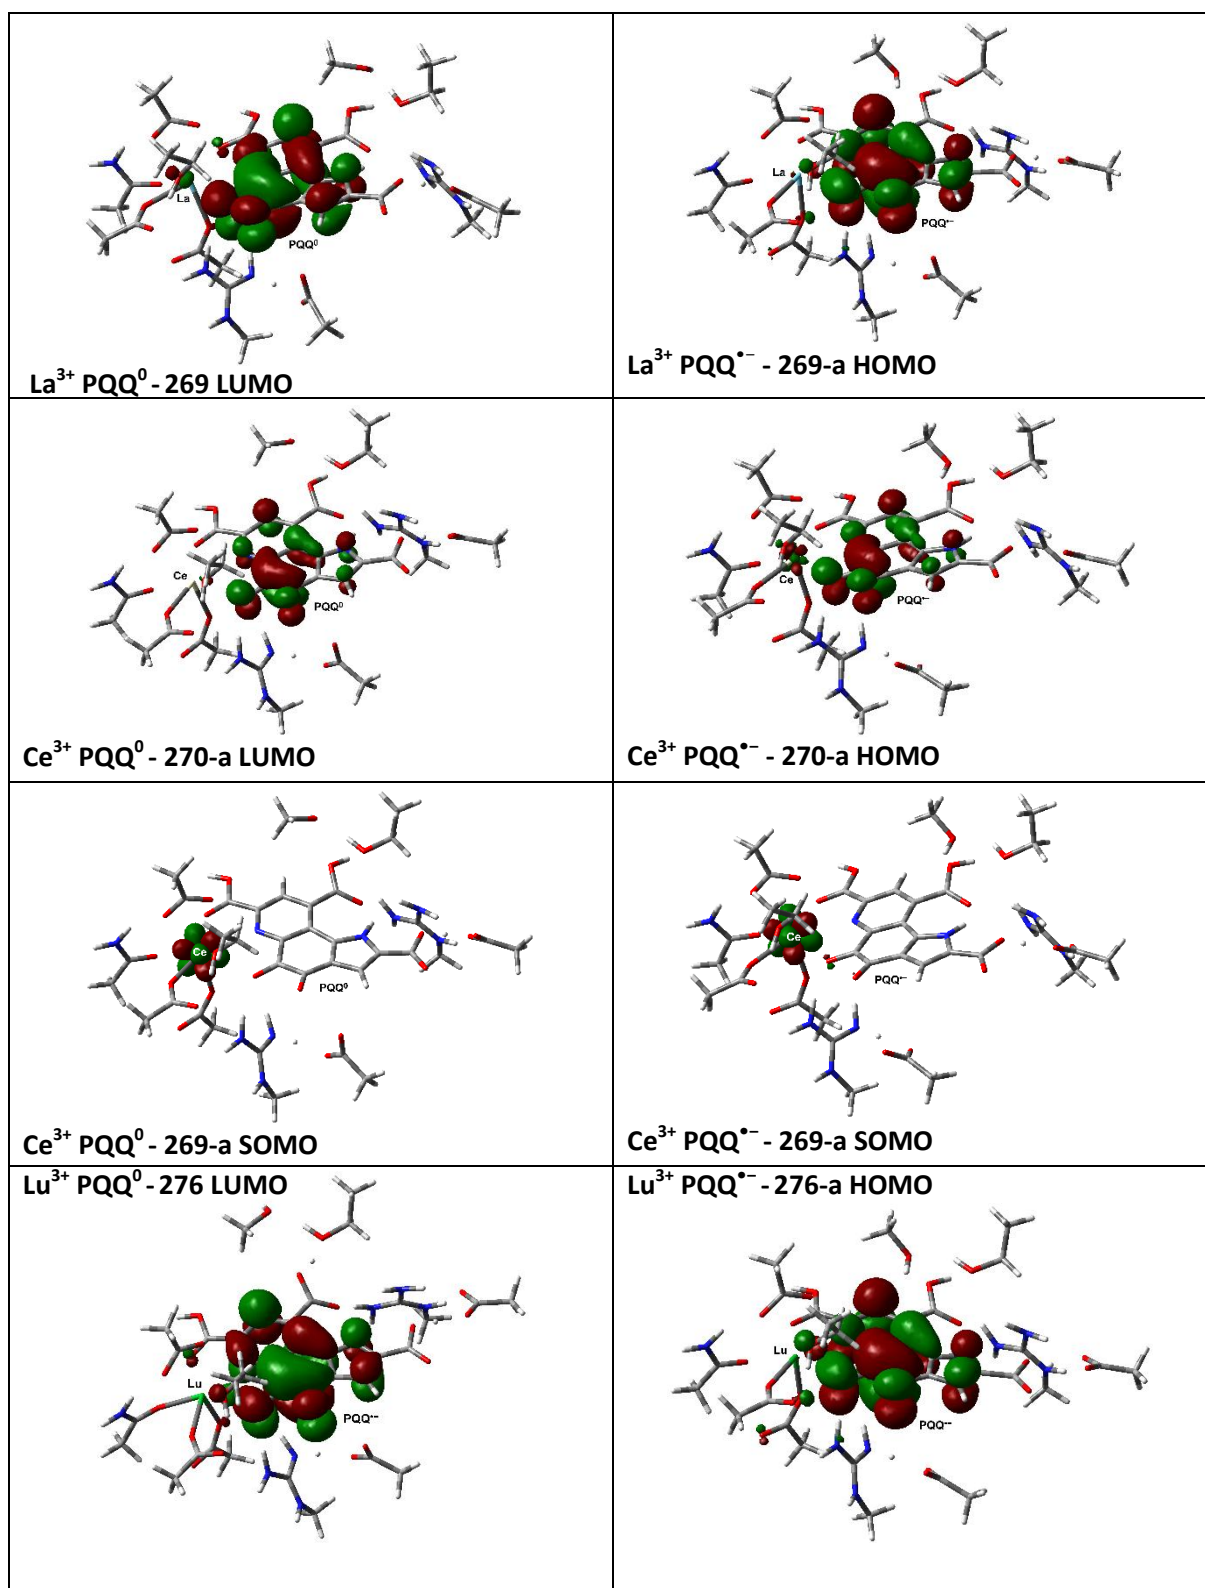

## References

1. E. F. Pettersen, T. D. Goddard, C. C. Huang, G. S. Couch, D. M. Greenblatt, E. C. Meng and T. E. Ferrin, *J. Comput. Chem.*, 2004, **25**, 1605-1612.
2. J. A. Bogart, A. J. Lewis and E. J. Schelter, *Chem.–Eur. J.*, 2014, **21**, 1743-1748.
3. M. J. Frisch, G. W. Trucks, H. B. Schlegel, G. E. Scuseria, M. A. Robb, J. R. Cheeseman, G. Scalmani, V. Barone, G. A. Petersson, H. Nakatsuji, M. C. X. Li, A. Marenich, J. Bloino, B. G. Janesko, R. Gomperts, B. Mennucci, H. P. Hratchian, J. V. Ortiz, A. F. Izmaylov, J. L. Sonnenberg, D. Williams-Young, F. Ding, F. Lipparini, F. Egidi, J. Goings, B. Peng, A. Petrone, T. Henderson, D. Ranasinghe, V. G. Zakrzewski, J. Gao, N. Rega, G. Zheng, W. Liang, M. Hada, M. Ehara, K. Toyota, R. Fukuda, J. Hasegawa, M. Ishida, T. Nakajima, Y. Honda, O. Kitao, H. Nakai, T. Vreven, K. Throssell, J. A. Montgomery, J. E. P. Jr., F. Ogliaro, M. Bearpark, J. J. Heyd, E. Brothers, K. N. Kudin, V. N. Staroverov, T. Keith, R. Kobayashi, J. Normand, K. Raghavachari, A. Rendell, J. C. Burant, S. S. Iyengar, J. Tomasi, M. Cossi, J. M. Millam, M. Klene, C. Adamo, R. Cammi, J. W. Ochterski, R. L. Martin, K. Morokuma, O. Farkas, J. B. Foresman and D. J. Fox, *Gaussian 09, Revision A.02*, Gaussian, Inc., Wallingford CT, 2016.
4. A. D. Becke, *J. Chem. Phys.*, 1993, **98**, 5648-5652.
5. C. Lee, W. Yang and R. G. Parr, *Physical Review B*, 1988, **37**, 785-789.
6. G. A. Petersson and M. A. Al-Laham, *J. Chem. Phys.*, 1991, **94**, 6081-6090.
7. G. A. Petersson, T. G. Tensfeldt and J. A. M. Jr., *J. Chem. Phys.*, 1991, **94**, 6091-6101.
8. P. J. Stephens, F. J. Devlin, C. F. Chabalowski and M. J. Frisch, *J. Phys. Chem.*, 1994, **98**, 11623-11627.
9. S. H. Vosko, L. Wilk and M. Nusair, *Can. J. Phys.*, 1980, **58**, 1200-1211.
10. A. Pol, T. R. M. Barends, A. Dietl, A. F. Khadem, J. Eygensteyn, M. S. M. Jetten and H. J. M. Op den Camp, *Environ. Microbiol.*, 2014, **16**, 255-264.
11. X. Cao and M. Dolg, *J. Mol. Struct. THEOCHEM*, 2002, **581**, 139-147.
12. M. Dolg, H. Stoll and H. Preuss, *J. Chem. Phys.*, 1989, **90**, 1730-1734.
13. Taken from <http://www.tc.uni-koeln.de/PP/clickpse.en.html> visited: Jan 22nd 2018).
14. M. Regueiro-Figueroa, D. Esteban-Gómez, A. de Blas, T. Rodríguez-Blas and C. Platas-Iglesias, *Chem.–Eur. J.*, 2014, **20**, 3974-3981.
15. CODATA Recommended Values. National Institute of Standards and Technology. <https://physics.nist.gov/cgi-bin/cuu/Value?threv> visited Mar 26th 2018).
